# Supplementary material for: Dormant Nfatc1 reporter-marked basal stem/progenitor cells contribute to mammary lobuloalveoli formation
Source: PubMed Central journal article supplement — iScience. 2022 Feb 26;25(3):103982. doi: 10.1016/j.isci.2022.103982 (PMC8924625; doi:10.1016/j.isci.2022.103982), 2022-02-26
Supplement: mmc1.pdf [file mmc1.pdf]

iScience, Volume 25

## Supplemental information

**Dormant *Nfatc1* reporter-marked  
basal stem/progenitor cells contribute  
to mammary lobuloalveoli formation**

**Ruiqi Liu, Huan Hu, Melissa McNeil, Jiuzhi Xu, Xueyun Bi, Pengbo Lou, Christian F. Guerrero-Juarez, Xing Dai, Maksim V. Plikus, Jianwei Shuai, Zhengquan Yu, and Cong Lv**

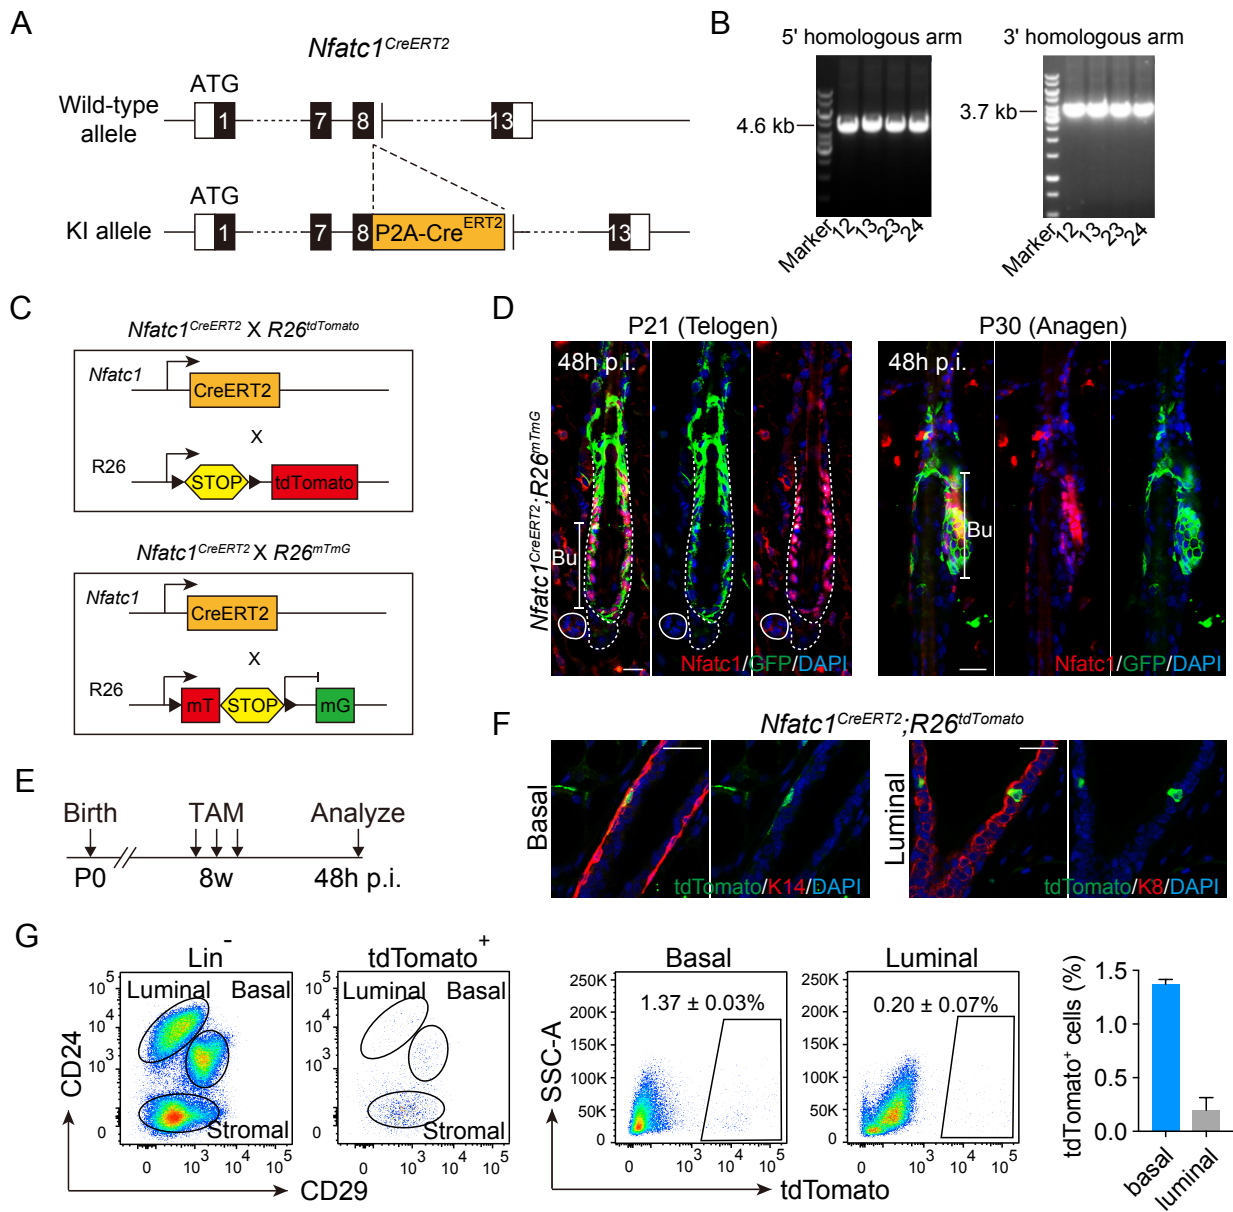

**Figure S1. Generation of *Nfatc1*<sup>CreERT2</sup> knock-in mice. Related to Figure 1.**

**(A)** Schematic representation of the *Nfatc1*<sup>CreERT2</sup> targeting strategy.

**(B)** Identification of F0 *Nfatc1*<sup>CreERT2</sup> mice by amplification of the 5' and 3' arms.

**(C)** Generation of *Nfatc1*<sup>CreERT2</sup>;*R26-mTmG* and *Nfatc1*<sup>CreERT2</sup>;*R26<sup>tdTomato</sup>* mice.

**(D)** Co-immunostaining assay of GFP (green) and *Nfatc1* (red) in hair follicles from *Nfatc1*<sup>CreERT2</sup>;*R26<sup>mTmG</sup>* mice at P21 (Telogen) and P30 (Anagen). The mice were administered single dose of TAM, and skin samples were collected 48 hours post-induction (p.i.). n = 3 mice for each timepoint. Bu indicates bulge. Scale bar, 25  $\mu$ m.

**(E)** Experimental strategy for marking *Nfatc1*<sup>+</sup> cells using female *Nfatc1*<sup>CreERT2</sup>;*R26<sup>mTmG</sup>* mice at the age of 8 weeks.

**(F)** Co-immunostaining assay of tdTomato (green) and K14 (red) in mammary glands from *Nfatc1*<sup>CreERT2</sup>;*R26<sup>tdTomato</sup>* mice at the age of 8 weeks. The mice were administered TAM 3 times, and the samples were collected 48 hours after the last induction. n = 3 mice. Scale bar, 50  $\mu$ m.

**(G)** Flow cytometry for tdTomato<sup>+</sup> cells from *Nfatc1*<sup>CreERT2</sup>;*R26<sup>tdTomato</sup>* mice at the age of 8 weeks. Another approach to analysis is also shown. Total tdTomato<sup>+</sup> cells were applied to CD24 and CD29 gates, showing the distribution of tdTomato<sup>+</sup> cells in the basal and luminal layers. Quantification analysis shows the percentages of tdTomato<sup>+</sup> basal and luminal cells. n = 3 mice.

Data represent the mean value  $\pm$  SD.

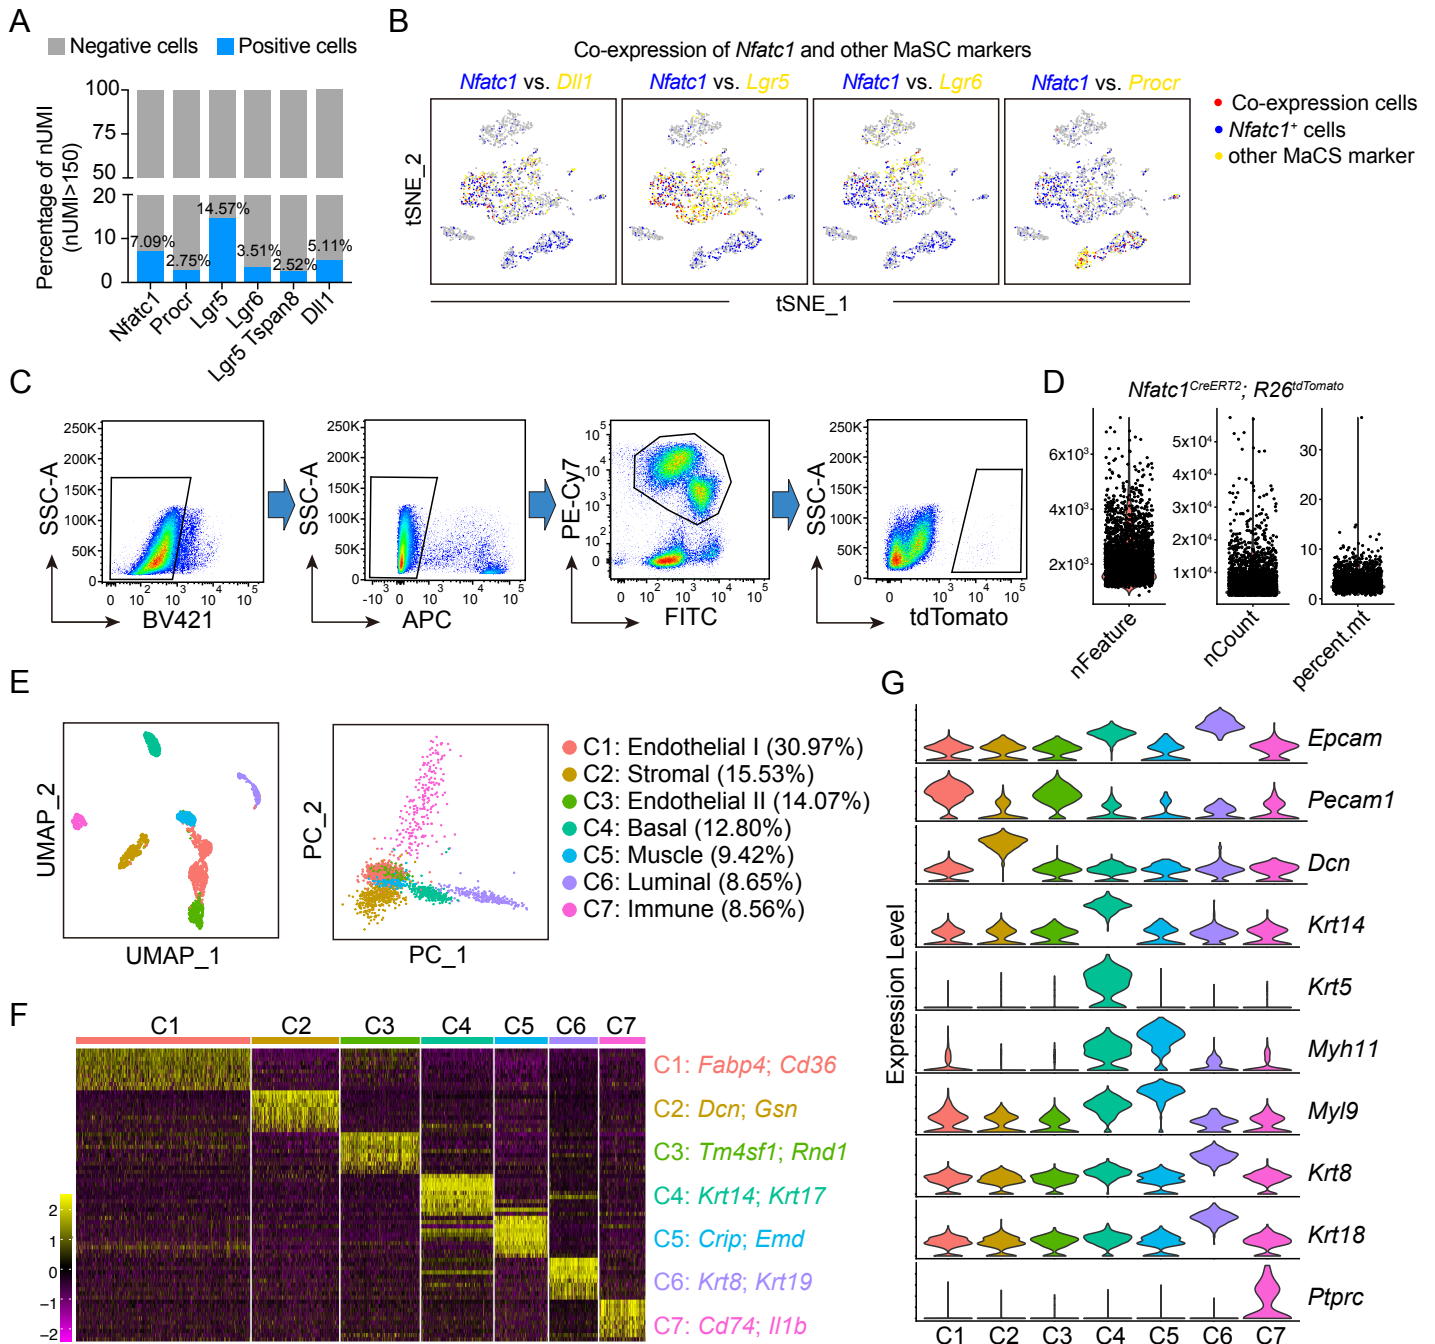



**Figure S2. *Nfatc1* reporter-marked stem/progenitor cells are dormant and distinct from other known MaSCs. Related to Figure 2.**

**(A)** Quantification analysis showing the percentages of *Nfatc1*<sup>+</sup>, *Procr*<sup>+</sup>, *Lgr5*<sup>+</sup>, *Lgr6*<sup>+</sup>, double *Lgr5*<sup>+</sup>*Tspan8*<sup>+</sup> and *Dll1*<sup>+</sup> basal cells among total basal cells. A nUMI count > 150 was used as a cutoff to remove low-expression cells.

**(B)** Feature plots showing the co-expression of *Nfatc1* and other MaSC marker genes (*Dll1*, *Lgr5*, *Lgr6*, and *Procr*). The expression of *Nfatc1* is shown in blue, the expression of other MaSC marker genes is shown in yellow, and co-expression is shown in red.

**(C)** The FACS strategy for sorting tdTomato<sup>+</sup> cells for single-cell RNA-seq. *Nfatc1*<sup>CreERT2</sup>;R26<sup>tdTomato</sup> mice were administered TAM 3 times, and the samples were collected 48 hours after the last induction.

**(D)** Quality control for the scRNA-seq data of total tdTomato<sup>+</sup> cells from *Nfatc1*<sup>CreERT2</sup>;R26<sup>tdTomato</sup> mice.

**(E)** UMAP and PCA plots reveal the cellular heterogeneity of the 2592 sorted tdTomato<sup>+</sup> cells from *Nfatc1*<sup>CreERT2</sup>;R26<sup>tdTomato</sup> mice in (C).

**(F)** Heatmap showing differentially expressed genes in each cluster in (E).

**(G)** Violin plots showing known signature genes in each cluster.

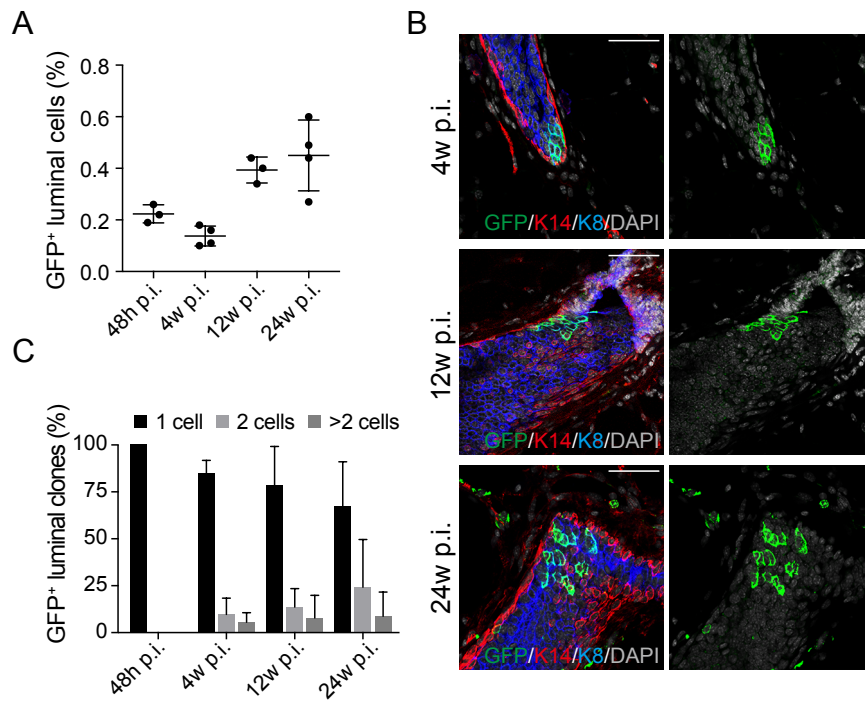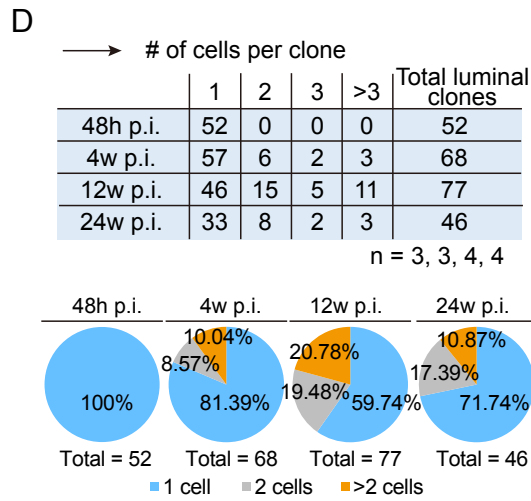

**Figure S3. Contribution of *Nfatc1* reporter-marked luminal epithelial cells to the mammary epithelium during homeostasis. Related to Figure 3.**

**(A)** Quantification of GFP<sup>+</sup> luminal cells among total luminal cells in *Nfatc1*<sup>CreERT2</sup>;*R26*<sup>mTmG</sup> mice 48 hours and 4, 12, and 24 weeks post-induction. n = 3, 3, 4, and 4 mice, respectively.

**(B)** Co-immunostaining assay of GFP (green), K14 (red), and K8 (blue) in *Nfatc1*<sup>CreERT2</sup>;*R26*<sup>mTmG</sup> mice 4, 12, and 24 weeks post-induction, showing the existence of luminal multicell GFP<sup>+</sup> clones. Scale bar, 50 μm.

**(C and D)** Quantification analysis showing the number and percentage of single-cell, two-cell and multicell luminal clones in *Nfatc1*<sup>CreERT2</sup>;*R26*<sup>mTmG</sup> mice at the indicated timepoints (D). n = 3, 3, 4, 4 mice, respectively. Another statistical method is shown in (C). In total, 52, 68, 77 and 46 luminal clones were quantified, respectively.

Data represent the mean value ± SD.

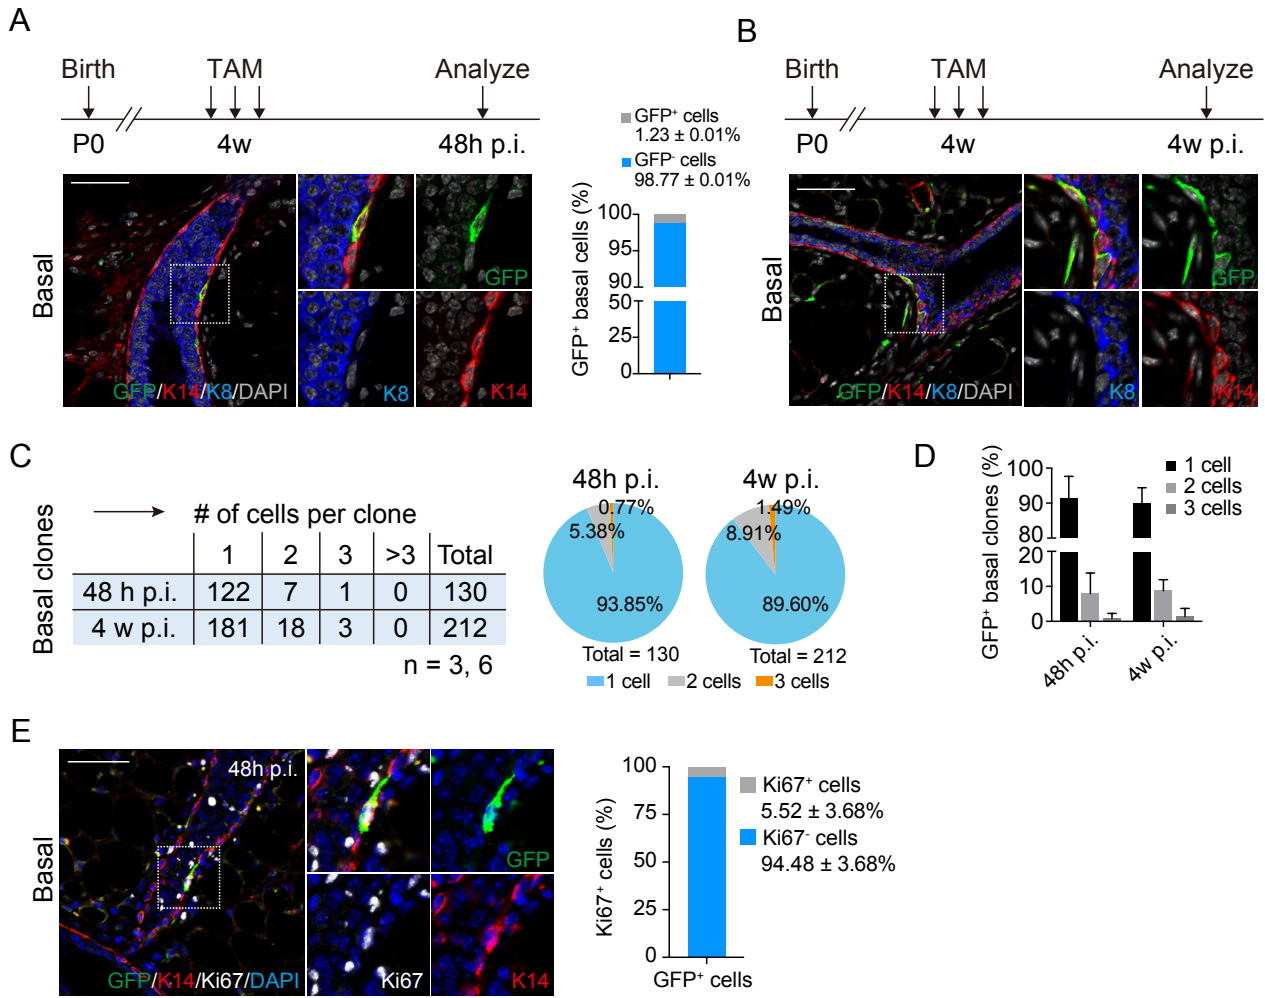

**Figure S4. The contribution of *Nfatc1* reporter-marked epithelial cells to the homeostasis of the mammary epithelium during puberty. Related to Figure 3.**

**(A)** Co-immunostaining assay of GFP (green), K14 (red), and K8 (blue) in the *Nfatc1*<sup>CreERT2</sup>;*R26*<sup>mTmG</sup> mammary gland. The female mice were administered TAM 3 times at the age of 4 weeks, and the samples were collected 48 hours after the last induction. Quantification analysis showing the percentage of GFP<sup>+</sup> basal cells among total basal cells at this timepoint. In total, 2018 basal epithelial cells from 3 mice were quantified.

**(B)** Co-immunostaining assay of GFP (green), K14 (red), and K8 (blue) in the *Nfatc1*<sup>CreERT2</sup>;*R26*<sup>mTmG</sup> mammary gland. The female mice were administered TAM 3 times at the age of 4 weeks, and the samples were collected 4 weeks after the last induction.

**(C and D)** Quantification analysis showing the number (left panel in (C)) and the percentage (right panel in (C)) of single-cell, two-cell and multicell basal clones in *Nfatc1*<sup>CreERT2</sup>;*R26*<sup>mTmG</sup> mice at the indicated timepoints. Another statistical result is also shown in Panel (D). n = 3 and 6 mice 48 hours and 4 weeks after induction, respectively and a total of 130 and 212 basal clones were quantified, respectively.

**(E)** Co-immunostaining assay of GFP (green), K14 (red) and Ki67 (white) in *Nfatc1*<sup>CreERT2</sup>;*R26*<sup>mTmG</sup> mice. Scale bar, 50  $\mu$ m. Quantification analysis shows the percentage of GFP<sup>+</sup>Ki67<sup>+</sup> basal cells per GFP<sup>+</sup> basal cells. In total, 129 GFP<sup>+</sup> cells from 3 mice were quantified.

Data represent the mean value  $\pm$  SD.

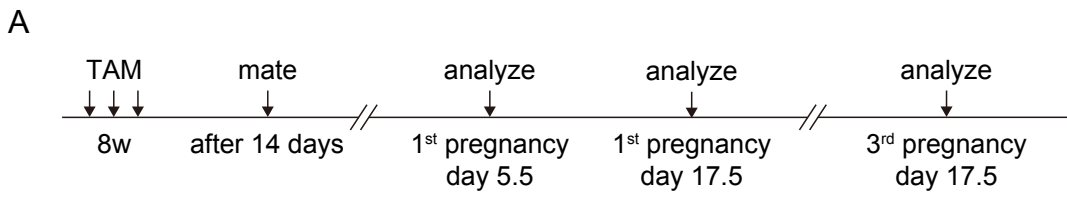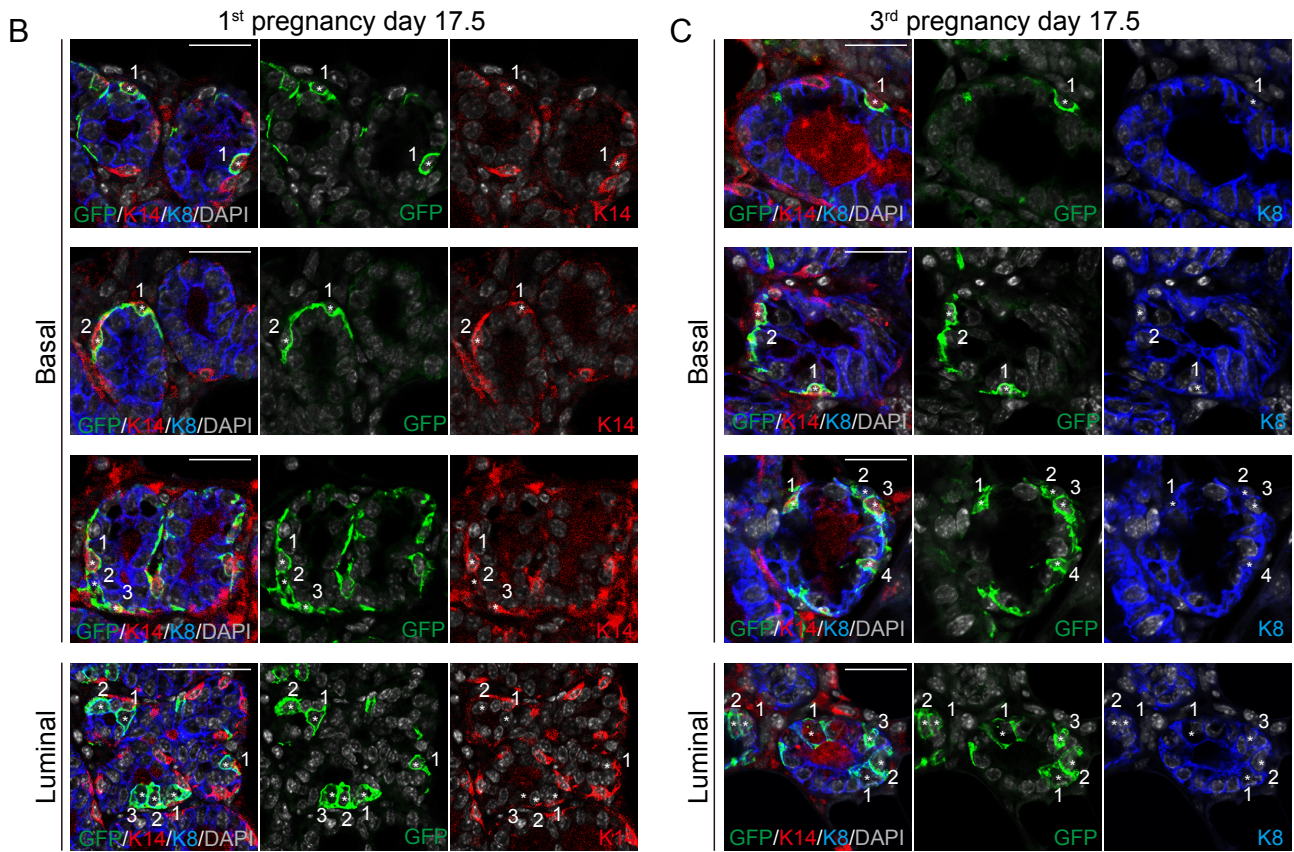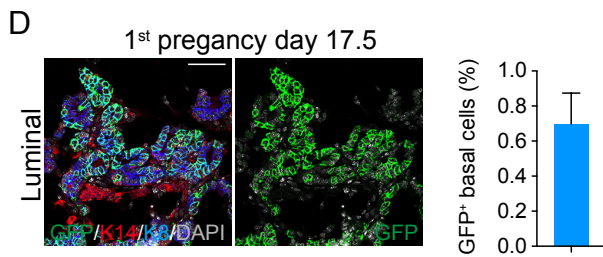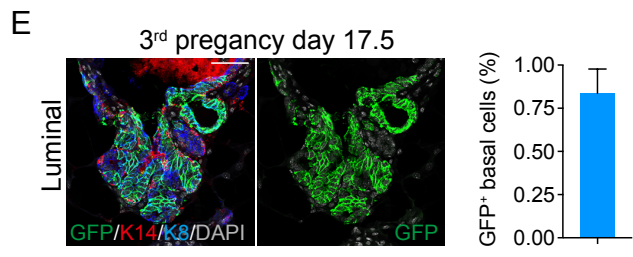

**F**

| luminal clones | pergnancy cycle          | → # of cells per clone |    |    |   |    | Total |
|----------------|--------------------------|------------------------|----|----|---|----|-------|
|                |                          | 1                      | 2  | 3  | 4 | >4 |       |
|                | 1 <sup>st</sup> day 5.5  | 46                     | 12 | 8  | 0 | 0  | 66    |
|                | 1 <sup>st</sup> day 17.5 | 49                     | 24 | 12 | 4 | 26 | 115   |
|                | 3 <sup>rd</sup> day 17.5 | 10                     | 8  | 5  | 3 | 15 | 41    |

n = 3, 3, 3

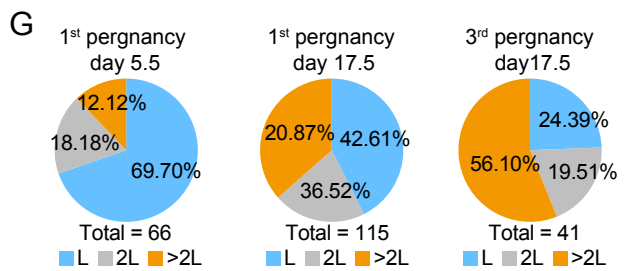



**Figure S5. *Nfatc1* reporter-marked luminal cells contribute to lobuloalveolar development during pregnancy. Related to Figure 4.**

**(A)** Strategy for the lineage tracing during pregnancy.

**(B and C)** Immunostaining analysis showing the identification standards for single-cell, two-cell and multicell GFP<sup>+</sup> clones in the basal and luminal layers. *Nfatc1*<sup>CreERT2</sup>;*R26*<sup>mTmG</sup> mice were analyzed on 1<sup>st</sup> pregnancy day 17.5 (B) and 3<sup>rd</sup> pregnancy day 17.5 (C).

**(D and E)** Co-immunostaining assay of GFP (green), K14 (red), and K8 (blue) in *Nfatc1*<sup>CreERT2</sup>;*R26*<sup>mTmG</sup> mammary glands at 1<sup>st</sup> pregnancy day 17.5 (D) and 3<sup>rd</sup> pregnancy day 17.5 (E). Scale bar, 50 μm. Quantification analysis showing the percentage of GFP<sup>+</sup> luminal cells among total luminal cells for *Nfatc1*<sup>CreERT2</sup>;*R26*<sup>mTmG</sup> mice at 1<sup>st</sup> pregnancy day 17.5 (D) and 3<sup>rd</sup> pregnancy day 17.5 (E). n = 3 mice for each timepoint.

**(F and G)** Clonal analysis showing the number (F) and the percentage (G) of single-cell, two-cell and multicell luminal clones in *Nfatc1*<sup>CreERT2</sup>;*R26*<sup>mTmG</sup> mice at 1<sup>st</sup> pregnancy day 5.5, 1<sup>st</sup> pregnancy day 17.5 and 3<sup>rd</sup> pregnancy day 17.5. n = 3 mice for each timepoint.

Data represent the mean value ± SD.

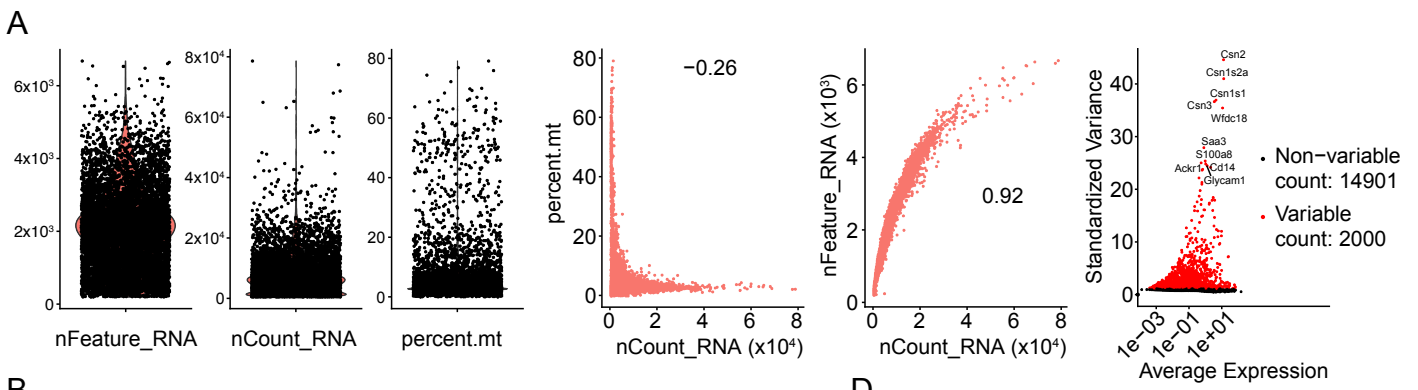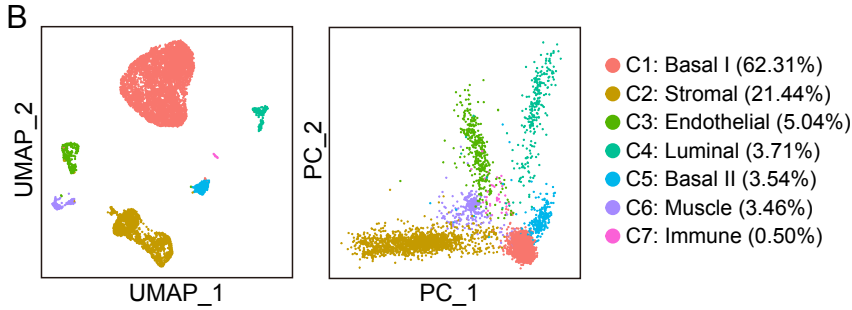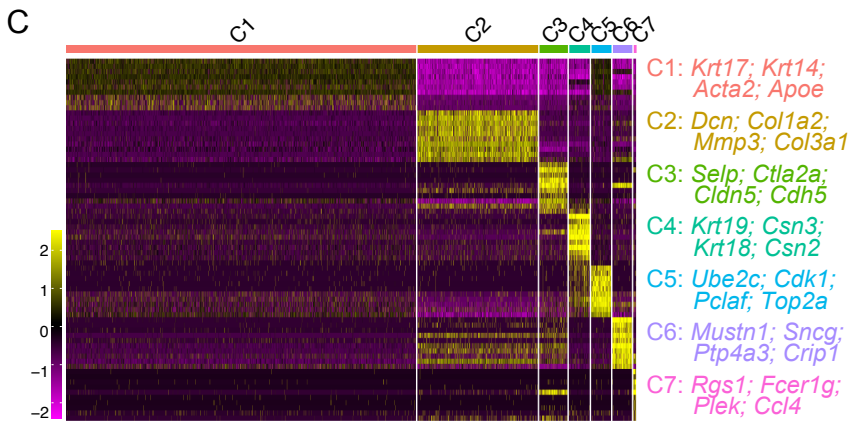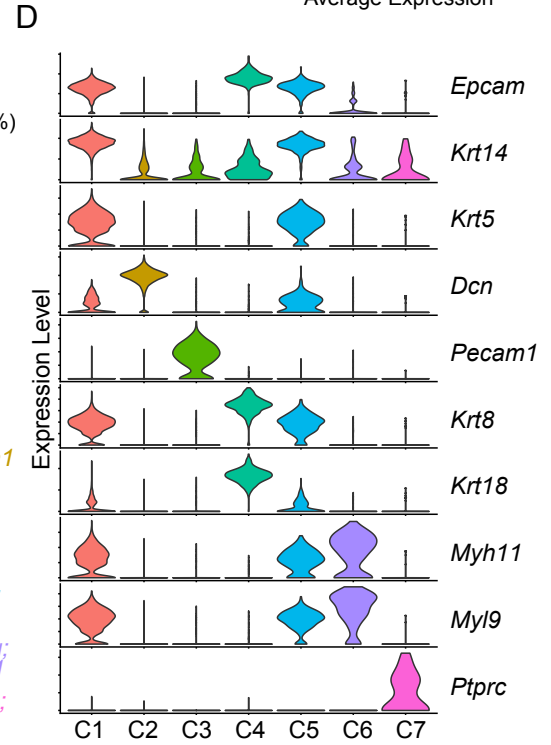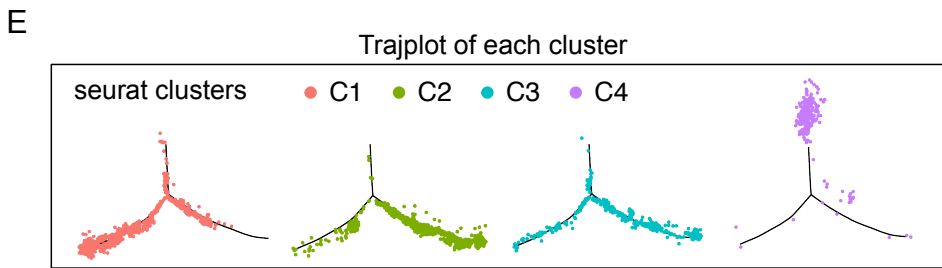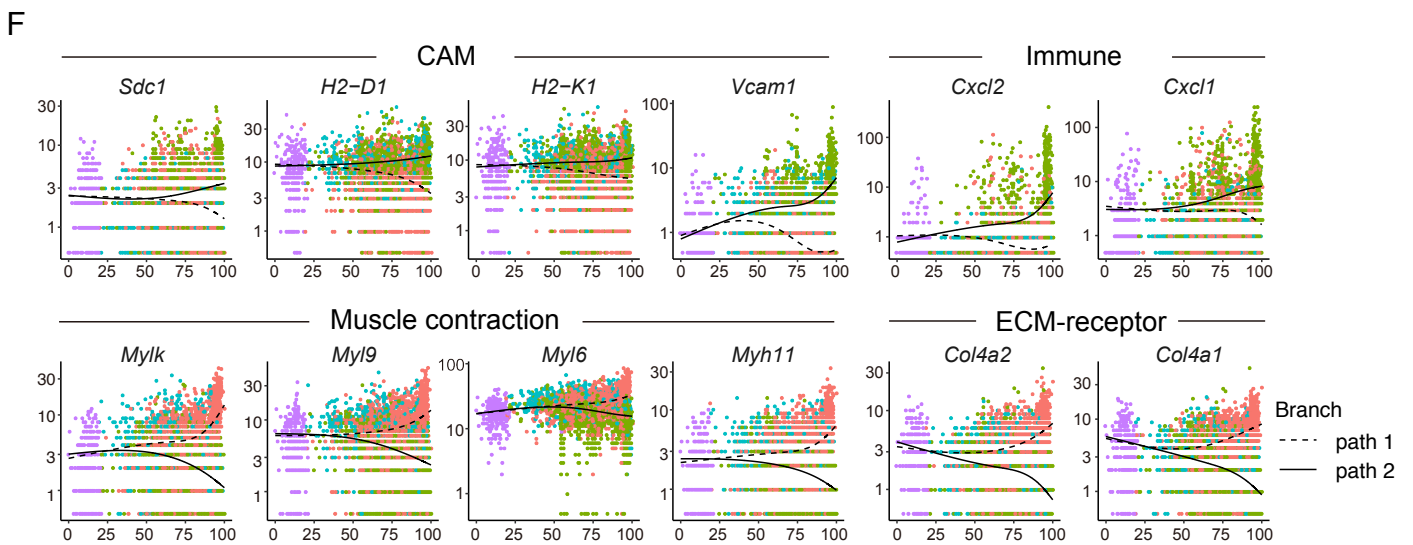



**Figure S6. Nfatc1-lineage basal epithelial cells are heterogeneous during pregnancy. Related to Figure 5.**

**(A)** Quality control for the scRNA-seq data of tdTomato<sup>+</sup> cells sorted from *Nfatc1*<sup>CreERT2</sup>; *R26*<sup>tdTomato</sup> mice at 1<sup>st</sup> pregnancy day 14.5. The female mice were administered TAM 3 times at the age of 8 weeks and then bred until pregnancy. The samples were collected at 1<sup>st</sup> pregnancy day 14.5.

**(B)** UMAP and PCA plots reveal the cellular heterogeneity of the 6745 sorted tdTomato<sup>+</sup> cells from *Nfatc1*<sup>CreERT2</sup>; *R26*<sup>tdTomato</sup> mice on 1<sup>st</sup> pregnancy day 14.5.

**(C)** Heatmap showing differentially expressed genes in each cluster.

**(D)** Violin plots showing the signature genes for each cluster.

**(E)** Each cluster is shown in the order of the pseudotime trajectory.

**(F)** Some genes functioning in CAM, immune, muscle contraction and ECM receptors were distributed in distinct directions of the pseudotime trajectory.
